# Supplementary material for: DeepciRGO: functional prediction of circular RNAs through hierarchical deep neural networks using heterogeneous network features
Source: PubMed Central journal article supplement (PMC7659092; doi:10.1186/s12859-020-03748-3), 2020-11-12
Supplement: 12859_2020_3748_MOESM1_ESM.pdf [file 12859_2020_3748_MOESM1_ESM.pdf]

# SUPPLEMENTARY MATERIALS

## DeepciRGO: Functional prediction of circular RNAs based on the heterogeneous networks

Lei Deng , Wei Lin , Jiacheng Wang and Jingpu Zhang

### 1 Experimental result

When we manually annotated independent test data sets (circRNA2GO-62), we found that circRNA's functions in cells were mostly biological processes (BP), and only a small part were cellular components (CC) and molecular functions (MF). So, in order to better evaluate our model, we only did comparative experiments on biological processes. Given a target circRNA, the candidate GO terms are predicted and ranked by DeepciRGO. In order to compare whether the predicted GO terms are consistent with the circRNA function confirmed by experiments, we sorted the predicted GO according to the predicted score and evaluated the top 20 GO terms of BP.

#### 1.1 Case study:CircMYLK

CircMYLK, also known as hsa\_circ\_0002768, is spliced from the MYLK gene [1]. By screening circRNA expression profiles, Zhong et al. found that the circMYLK levels were significantly increased in bladder cancer tissue samples than in matched normal bladder tissue samples and that the circMYLK levels were correlated with bladder cancer stage [2]. In bladder cancer cells studied in vitro, upregulation of circMYLK enhanced tumor cell growth, migration and apoptotic process[3], whereas circMYLK knockdown resulted in the opposite effects. In vivo studies showed that circMYLK upregulation promoted the growth of xenograft tumors [2]. Further studies have shown that circMYLK regulates the expression of vascular endothelial growth factor A (VEGFA), induces epithelial–mesenchymal transition (EMT), and activates Ras/ERK signaling [2].

CircMYLK are annotated with 64 GO terms of biological process in total through DeepciRGO. The top 20 GO terms assigned to the CircMYLK are shown in Table S1. For biological process, most terms are involved in the regulation of cell migration, cell growth, vasculature development as well as regulation of gene expression. such as GO:0030336 (negative regulation of cell migration), GO:0030307 (positive regulation of cell growth), GO:0040008 (regulation of growth), GO:1901342 (regulation of vasculature development). The predicted function of CircMYLK by DeepciRGO is basically consistent with the experimental results supported by the references.

**Table S1.** The top 20 predicted BP functions for CircMYLK (namely hsa\_circ\_0002768), which annotated with 64 GO terms of biological process in total by DeepciRGO.

| rank | GO term | GO name |
|------|---------|---------|
|------|---------|---------|

|    |            |                                                            |
|----|------------|------------------------------------------------------------|
| 1  | GO:1902589 | organelle organization                                     |
| 2  | GO:0043065 | positive regulation of apoptotic process                   |
| 3  | GO:0016043 | cellular component organization                            |
| 4  | GO:0071840 | Cellular component organization or biogenesis              |
| 5  | GO:0010468 | regulation of gene expression                              |
| 6  | GO:0010556 | regulation of macromolecule biosynthetic process           |
| 7  | GO:0008285 | negative regulation of cell population proliferation       |
| 8  | GO:0009966 | regulation of signal transduction                          |
| 9  | GO:0030336 | negative regulation of cell migration                      |
| 10 | GO:0032268 | regulation of cellular protein metabolic process           |
| 11 | GO:0051246 | regulation of protein metabolic process                    |
| 12 | GO:0032268 | regulation of cellular protein metabolic process           |
| 13 | GO:0031326 | regulation of cellular biosynthetic process                |
| 14 | GO:1901342 | regulation of vasculature development                      |
| 15 | GO:0035821 | modification of morphology or physiology of other organism |
| 16 | GO:0051047 | positive regulation of secretion                           |
| 17 | GO:1903532 | positive regulation of secretion by cell                   |
| 18 | GO:0030307 | positive regulation of cell growth                         |
| 19 | GO:0045927 | positive regulation of growth                              |
| 20 | GO:0040008 | regulation of growth                                       |

## 1.2 Case study:circZNF609

Studies have shown that circZNF609 could be translated into a protein, which was involved in controlling myoblast proliferation.[4] Meanwhile,circZNF609 increased oncogene p70S6K1 expression by sponging and sequestering miR-145-5p activity. Moreover, ectopic expression of miR-145-5p or silencing of p70S6K1 could effectively reverse circZNF609-induced promotion of breast cancer proliferation, migration, and invasion.[5] cZNF609 silencing decreased retinal vessel loss and suppressed pathological angiogenesis in vivo. cZNF609 silencing increased endothelial cell migration and tube formation, and protected endothelial cell against oxidative stress and hypoxia stress in vitro.[6]

In our study, circZNF609 are annotated with 48 GO terms of biological process in total through DeepciRGO. The top 20 GO terms assigned to the circZNF609 are shown in Table S2. For biological process, most terms are involved in the regulation of cell migration, cell growth and vasculature development. such as GO:0030335 (positive regulation of cell migration), GO:0030307 (positive regulation of cell growth), GO:0045927 (positive regulation of growth), GO:0040008 (regulation of growth), GO:1901342 (regulation of vasculature development). These data also show that the predicted circRNA functions of our model are basically consistent with those confirmed by experimental studies.

**Table S2.** The top 20 predicted BP functions for circZNF609 (namely hsa\_circ\_0000615), which annotated with 48 GO terms of biological process in total by DeepciRGO.

| Rank | GO term    | GO name                                                    |
|------|------------|------------------------------------------------------------|
| 1    | GO:0010628 | positive regulation of gene expression                     |
| 2    | GO:0010604 | positive regulation of macromolecule metabolic process     |
| 3    | GO:0009893 | positive regulation of metabolic process                   |
| 4    | GO:0071840 | Cellular component organization or biogenesis              |
| 5    | GO:0010468 | regulation of gene expression                              |
| 6    | GO:0030335 | positive regulation of cell migration                      |
| 7    | GO:2000147 | positive regulation of cell motility                       |
| 8    | GO:0040017 | positive regulation of locomotion                          |
| 9    | GO:0030336 | negative regulation of cell migration                      |
| 10   | GO:0051272 | positive regulation of cellular component movement         |
| 11   | GO:0030307 | positive regulation of cell growth                         |
| 12   | GO:0045927 | positive regulation of growth                              |
| 13   | GO:0040008 | regulation of growth                                       |
| 14   | GO:0051093 | negative regulation of developmental process               |
| 15   | GO:0035821 | modification of morphology or physiology of other organism |
| 16   | GO:1901342 | regulation of vasculature development                      |
| 17   | GO:0051128 | regulation of cellular component organization              |

|    |            |                                                |
|----|------------|------------------------------------------------|
| 18 | GO:0050793 | regulation of developmental process            |
| 19 | GO:1903532 | positive regulation of secretion by cell       |
| 20 | GO:0051239 | regulation of multicellular organismal process |

## References

- [1] Glažar P, Papavasileiou P, Rajewsky N. circBase: A database for circular RNAs. *RNA*. 2014;20(11):1666–70.
- [2] Zhong Z, Huang M, Lv M, et al. Circular RNA MYLK as a competing endogenous RNA promotes bladder cancer progression through modulating VEGFA/VEGFR2 signaling pathway. *Cancer Lett*. 2017;403:305–17.
- [3] Zhong Z, Huang M, Lv M, et al. Circular RNA MYLK as a competing endogenous RNA promotes bladder cancer progression through modulating VEGFA/VEGFR2 signaling pathway[J]. *Cancer letters*, 2017, 403: 305-317.
- [4] Legnini I, di Timoteo G, Rossi F, et al. Circ-ZNF609 is a circular RNA that can be translated and functions in myogenesis. *Mol Cell*. 2017;66(1):22 – 37.
- [5] Wang S, Xue X, Wang R, et al. CircZNF609 promotes breast cancer cell growth, migration, and invasion by elevating p70S6K1 via sponging miR-145-5p[J]. *Cancer management and research*, 2018, 10: 3881.
- [6] Liu C, Yao M D, Li C P, et al. Silencing of circular RNA-ZNF609 ameliorates vascular endothelial dysfunction[J]. *Theranostics*, 2017, 7(11): 2863.

## 2 Dataset

Since there is no available public database of lncRNA function annotations, we manually curate a independent test set of 62 circRNAs with 185 GO terms (named as circRNA2GO-62) based on references. Each annotation of circRNA2GO-62 is manually curated and contains referenced information about the circRNA, including sequences, genomic context, expression, subcellular localization, conservation, functional evidence and other relevant information.

**Table S3.** The independent test set of 62 circRNAs with 185 GO terms (named as circRNA2GO-62) based on references.

| <b>circRNA id</b> | <b>pmid</b> | <b>GO terms</b>                                                                         |
|-------------------|-------------|-----------------------------------------------------------------------------------------|
| hsa_circ_0000069  | 28003761    | GO:0008284,GO:0070317,GO:0030335                                                        |
| hsa_circ_0000096  | 28089832    | GO:0035198,GO:0030336                                                                   |
| hsa_circ_0000140  | 25689795    | GO:1903354                                                                              |
| hsa_circ_0000181  | 28940688    | GO:1903356,GO:2000401,GO:0045595                                                        |
| hsa_circ_0000284  | 28794202    | GO:2000402,GO:0045766,GO:0035198,GO:0030335,GO:0045766                                  |
| hsa_circ_0000284  | 27050392    | GO:0008284,GO:0030308                                                                   |
| hsa_circ_0000523  | 30403259    | GO:0043066,GO:0030177,GO:0035198                                                        |
| hsa_circ_0000523  | 25624062    | GO:0008285                                                                              |
| hsa_circ_0000594  | 28219405    | GO:0008284,GO:0030335,GO:0043066                                                        |
| hsa_circ_0000615  | 30288120    | GO:0035198,GO:0010628,GO:0030335,GO:0030307                                             |
| hsa_circ_0000615  | 28824721    | GO:0090051,GO:1900408                                                                   |
| hsa_circ_0000677  | 29928432    | GO:0030177,GO:0035198                                                                   |
| hsa_circ_0000677  | 27058418    | GO:0008284                                                                              |
| hsa_circ_0001313  | 28249903    | GO:0042127,GO:0030334                                                                   |
| hsa_circ_0001445  | 28765045    | GO:0030308,GO:0030336,GO:0035198,GO:0030177,GO:0006281,GO:0006260,GO:0045787,GO:0043066 |
| hsa_circ_0001649  | 29337065    | GO:0030336,GO:0043065                                                                   |
| hsa_circ_0001649  | 26600397    | GO:0008285                                                                              |
| hsa_circ_0001724  | 29207676    | GO:0008285,GO:0030336,GO:0035198                                                        |
| hsa_circ_0001727  | 28211215    | GO:2000346,GO:0030336                                                                   |
| hsa_circ_0001821  | 29693417    | GO:0010628,GO:0043066,GO:0030307                                                        |
| hsa_circ_0001821  | 27986464    | GO:0013598,GO:0008284                                                                   |
| hsa_circ_0001824  | 28484086    | GO:0035198                                                                              |
| hsa_circ_0001875  | 28484086    | GO:0035198,GO:0014068                                                                   |

|                  |          |                                                                                                                          |
|------------------|----------|--------------------------------------------------------------------------------------------------------------------------|
| hsa_circ_0001946 | 28174233 | GO:0014067,GO:0051898,GO:0008285,GO:0030336,GO:0030307,GO:1901224,GO:0045669,GO:0032024,GO:0035821,GO:0035198,GO:0010468 |
| hsa_circ_0002062 | 28682884 | GO:0035198,GO:1901186                                                                                                    |
| hsa_circ_0002138 | 25624062 | GO:0008285                                                                                                               |
| hsa_circ_0002768 | 28687357 | GO:0070374,GO:0030949,GO:0010718,GO:1903589,GO:0010468,GO:0035198,GO:0043065,GO:0008284,GO:0030335,GO:1900748            |
| hsa_circ_0003159 | 28618205 | GO:1903356                                                                                                               |
| hsa_circ_0003221 | 29125888 | GO:0008284,GO:0030335                                                                                                    |
| hsa_circ_0003222 | 30520539 | GO:2000774,GO:1901798                                                                                                    |
| hsa_circ_0003222 | 28893265 | GO:0035198, GO:0008285                                                                                                   |
| hsa_circ_0004018 | 28938566 | GO:0045595,GO:0035198                                                                                                    |
| hsa_circ_0004214 | 28622299 | GO:0046830,GO:0008284,GO:0010718,GO:0030335                                                                              |
| hsa_circ_0004383 | 27613831 | GO:0060253 GO:0045786,GO:0030111                                                                                         |
| hsa_circ_0004619 | 28484086 | GO:0035198,GO:0043065                                                                                                    |
| hsa_circ_0004712 | 28983619 | GO:0035198,GO:0010468                                                                                                    |
| hsa_circ_0004771 | 28484086 | GO:0035198                                                                                                               |
| hsa_circ_0005075 | 29710484 | GO:0035198,GO:0010468,GO:0030334,GO:0030260,GO:0042127                                                                   |
| hsa_circ_0005075 | 27258521 | GO:0022407                                                                                                               |
| hsa_circ_0005105 | 28276108 | GO:0010628,GO:0090091,GO:0035198                                                                                         |
| hsa_circ_0005986 | 28410211 | GO:0010629,GO:1900087,GO:0008284                                                                                         |
| hsa_circ_0006054 | 28484086 | GO:0035198                                                                                                               |
| hsa_circ_0006323 | 28947970 | GO:0035198,GO:0036207                                                                                                    |
| hsa_circ_0007874 | 28520103 | GO:2000346,GO:0043066,GO:0035198,GO:0010628                                                                              |
| hsa_circ_0011946 | 29593432 | GO:0010468,GO:0030336                                                                                                    |
| hsa_circ_0013339 | 30173892 | GO:0030336,GO:0043065,GO:0030177                                                                                         |

|                  |          |                                             |
|------------------|----------|---------------------------------------------|
| hsa_circ_0013339 | 28368401 | GO:0010628,GO:0008284                       |
| hsa_circ_0016347 | 28424426 | GO:0008284                                  |
| hsa_circ_0018289 | 29156822 | GO:0008285,GO:0030336,GO:0030260            |
| hsa_circ_0020397 | 28707774 | GO:0043066,GO:0030308,GO:0010628            |
| hsa_circ_0022342 | 28682884 | GO:0035198,GO:1901186                       |
| hsa_circ_0023404 | 29738762 | GO:0008285,GO:0045786,GO:0030336            |
| hsa_circ_0023404 | 26931159 | GO:0090091,GO:0035198,GO:0010628            |
| hsa_circ_0024169 | 25624062 | GO:0008285                                  |
| hsa_circ_0004712 | 28983619 | GO:0035198,GO:0010468                       |
| hsa_circ_0032970 | 28947970 | GO:0035198,GO:0036207                       |
| hsa_circ_0041103 | 27484176 | GO:0010628,GO:0030335,GO:0008284,GO:0035198 |
| hsa_circ_0043256 | 28958934 | GO:0043065,GO:0008285                       |
| hsa_circ_0138960 | 28980874 | GO:0008284,GO:0090091                       |
| hsa_circ_0051172 | 28947970 | GO:0035198,GO:0036207                       |
| hsa_circ_0052012 | 28983619 | GO:0035198,GO:0010468                       |
| hsa_circ_0054537 | 28947970 | GO:0035198,GO:0036207                       |
| hsa_circ_0057576 | 28947970 | GO:0035198,GO:0036207                       |
| hsa_circ_0064996 | 28983619 | GO:0035198,GO:0010468                       |
| hsa_circ_0067934 | 27752108 | GO:0030335,GO:0035197,GO:0008284,GO:0045785 |
| hsa_circ_0068942 | 28947970 | GO:0035198,GO:0036207                       |
| hsa_circ_0071410 | 28774651 | GO:0035198,GO:2000491                       |
| hsa_circ_0082824 | 28947970 | GO:0035198,GO:0036207                       |
| hsa_circ_0083357 | 28947970 | GO:0035198,GO:0036207                       |
| hsa_circ_0083964 | 28983619 | GO:0035198,GO:0010468                       |
| hsa_circ_0089378 | 28947970 | GO:0035198,GO:0036207                       |
| hsa_circ_0047905 | 28980874 | GO:0008284,GO:0090091                       |
